# Supplementary material for: Noise Expands the Response Range of the Bacillus subtilis Competence Circuit
Source: PubMed Central journal article supplement (PMC4803322; doi:10.1371/journal.pcbi.1004793), 2016-03-22

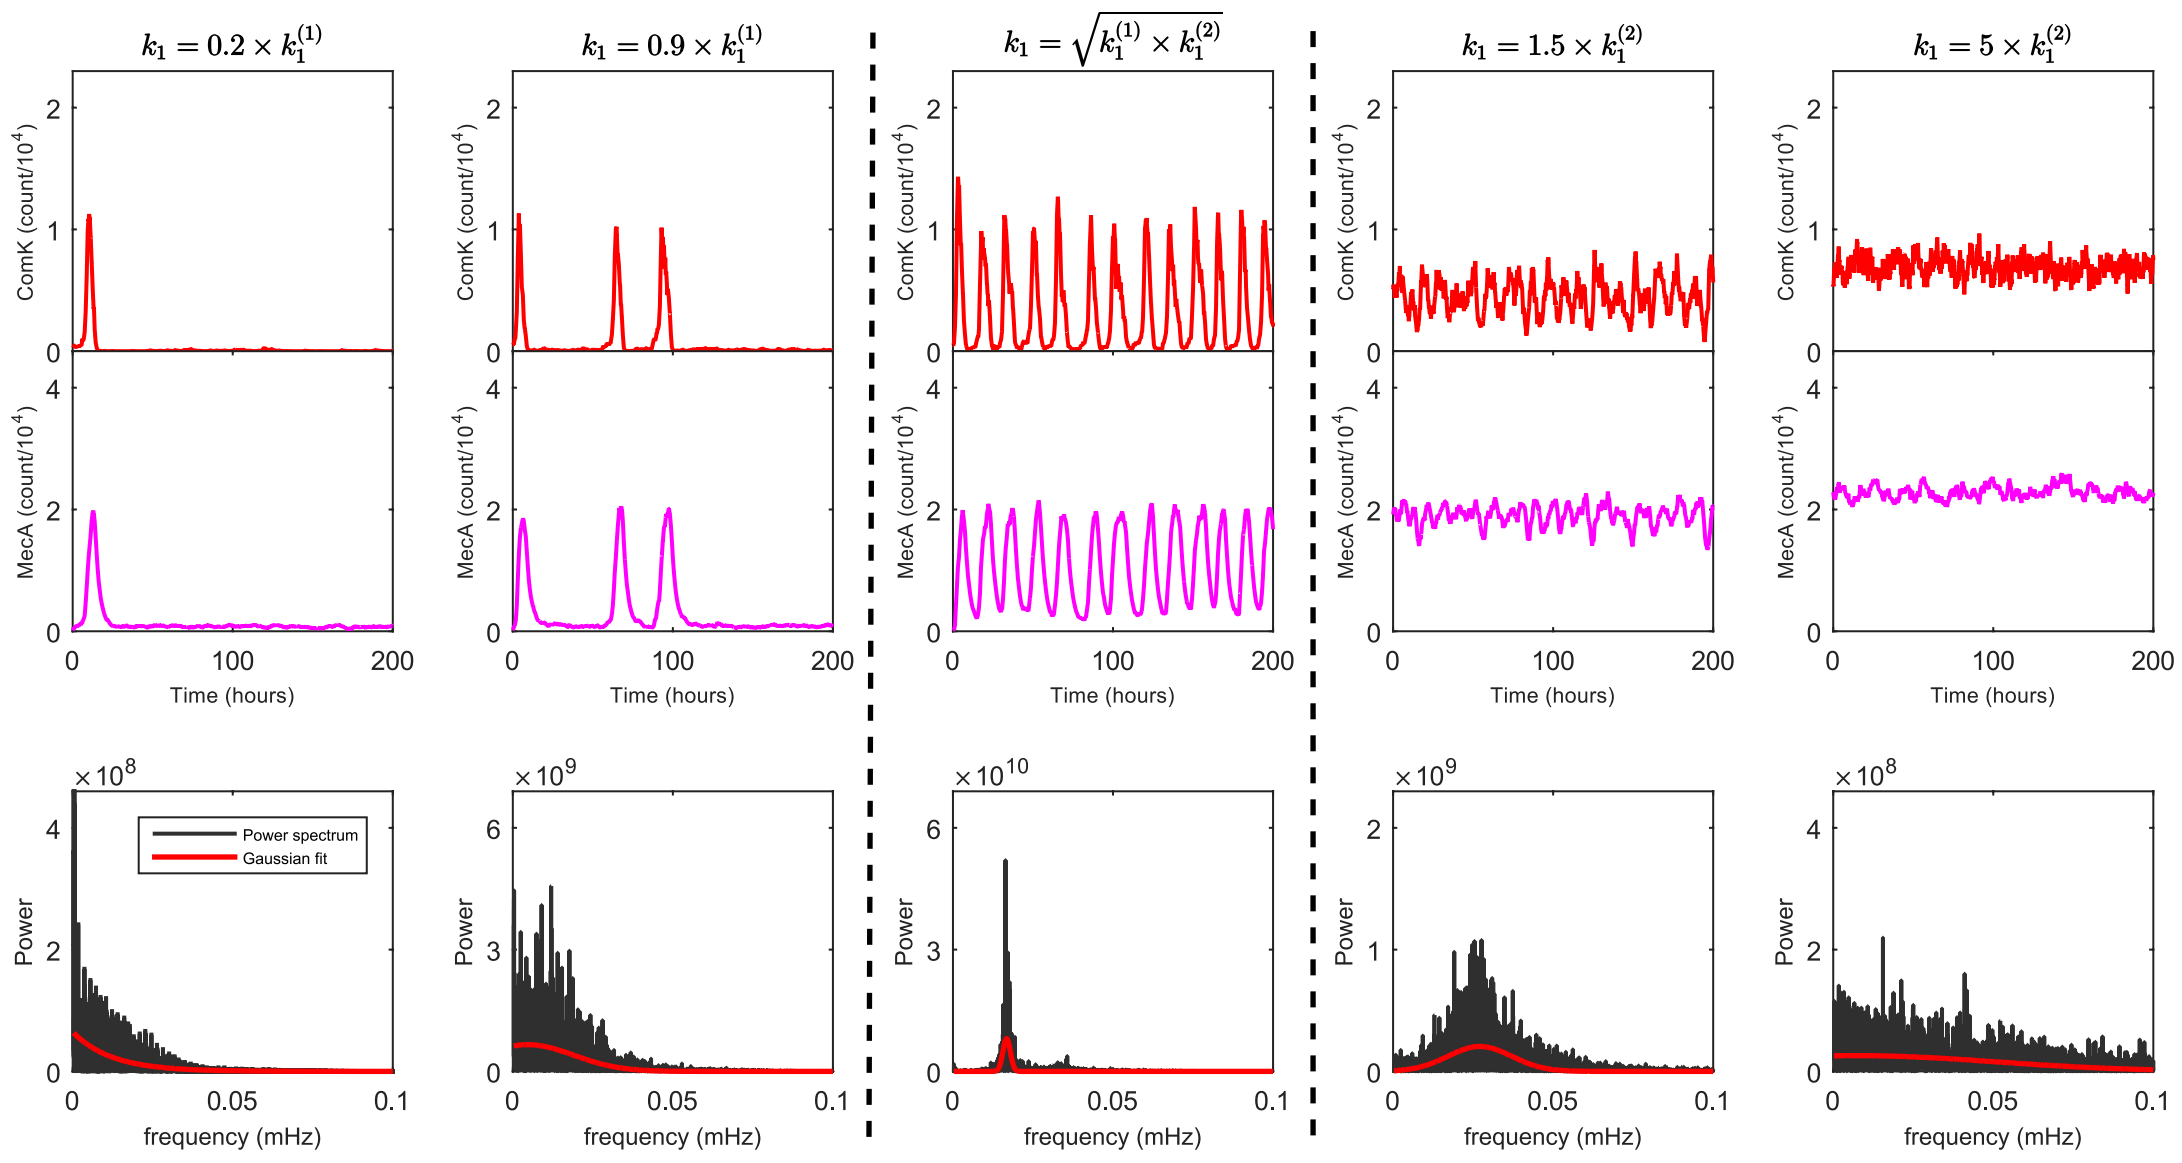

Supplement: pcbi.1004793.s008.pdf [file pcbi.1004793.s008.pdf]
