# Supplementary material for: Noise Expands the Response Range of the Bacillus subtilis Competence Circuit
Source: PubMed Central journal article supplement (PMC4803322; doi:10.1371/journal.pcbi.1004793), 2016-03-22
Supplement: pcbi.1004793.s012.pdf [file pcbi.1004793.s012.pdf]

Native

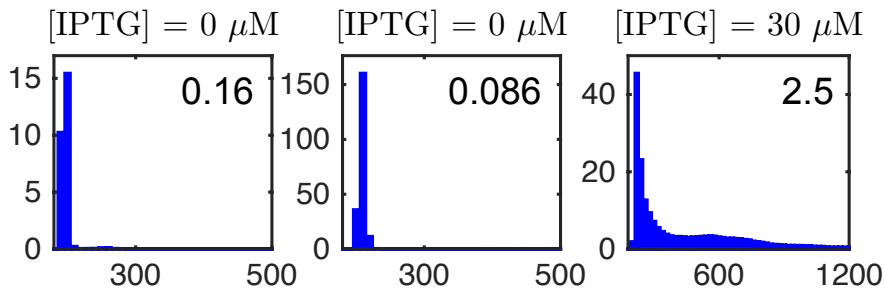

SynEx

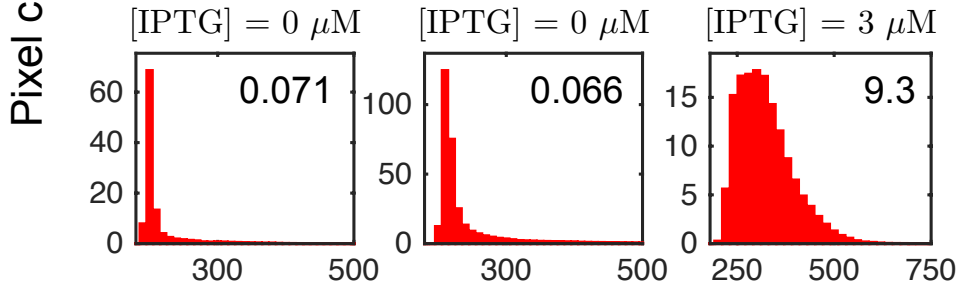

CFP fluorescence (reporter for ComK activity; AU)
